# Supplementary material for: Comparison of the Electrodialysis Performance in Tartrate Stabilization of a Red Wine Using Aliphatic and Aromatic Commercial and Modified Ion-Exchange Membranes
Source: MDPI journal article supplement (doi:10.3390/membranes13010084), 2023-01-09
Supplement: s1 [file s1]

# Comparison of the Electrodialysis Performance in Tartrate Stabilization of a Red Wine Using Aliphatic and Aromatic Commercial and Modified Ion-Exchange Membranes

Evgeniia Pasechnaya <sup>1</sup>, Kseniia Tsygurina <sup>1</sup>, Maria Ponomar <sup>1</sup>, Daria Chuprynnina <sup>2</sup>, Victor Nikonenko <sup>1</sup> and Natalia Pismenskaya <sup>1,\*</sup>

<sup>1</sup> Membrane Institute, Kuban State University, 350040 Krasnodar, Russia

<sup>2</sup> Department of Analytical Chemistry, Kuban State University, 350040 Krasnodar, Russia

\* Correspondence: n\_pismen@mail.ru

## S1. Structure of the studied ion-exchange membranes

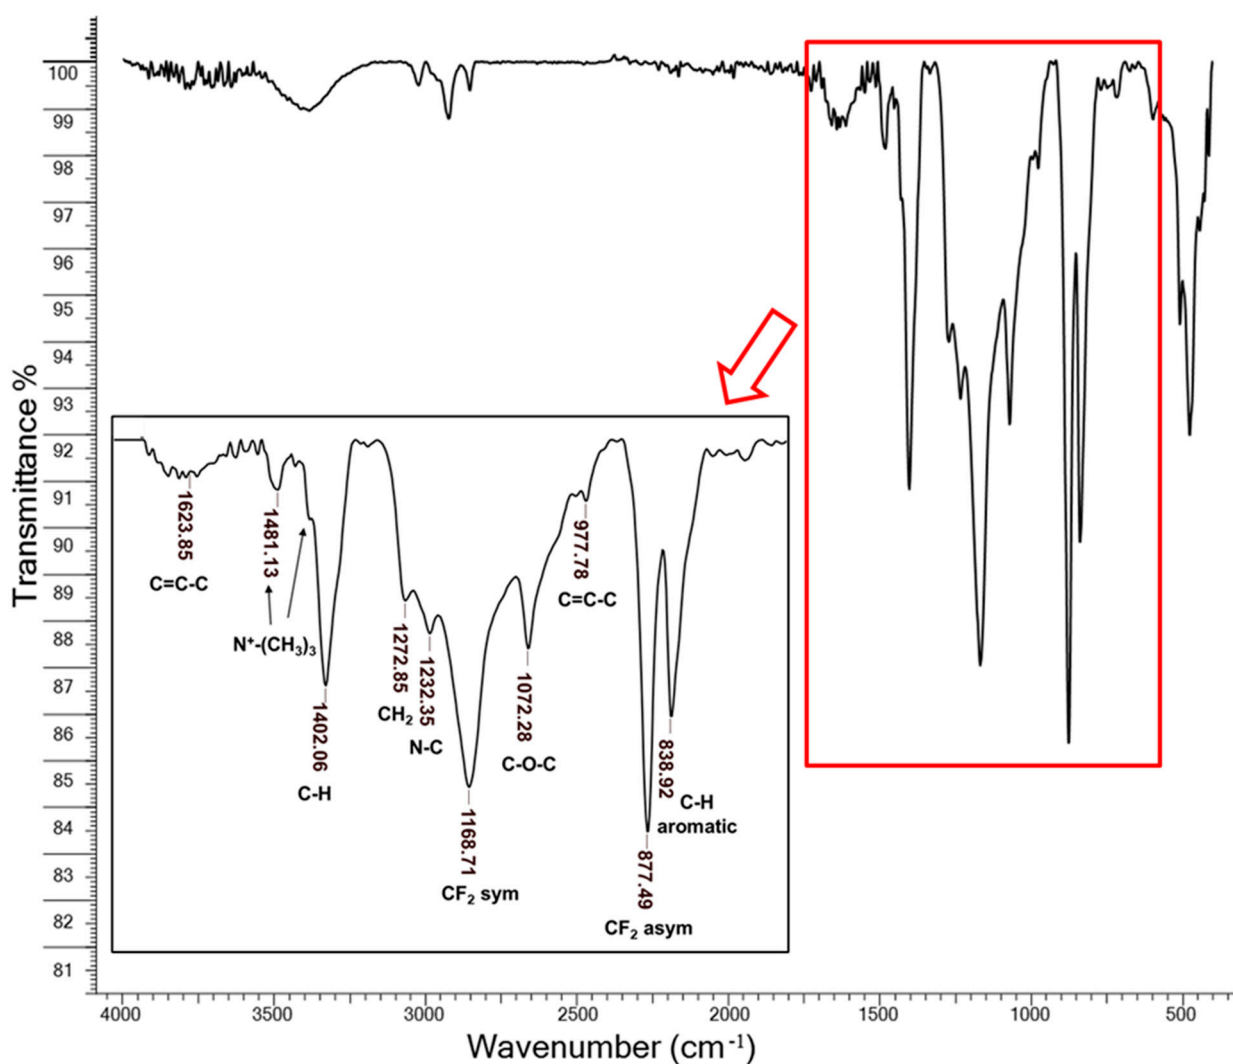

Figure S1. IR spectrum of the CJMA-3 membrane.

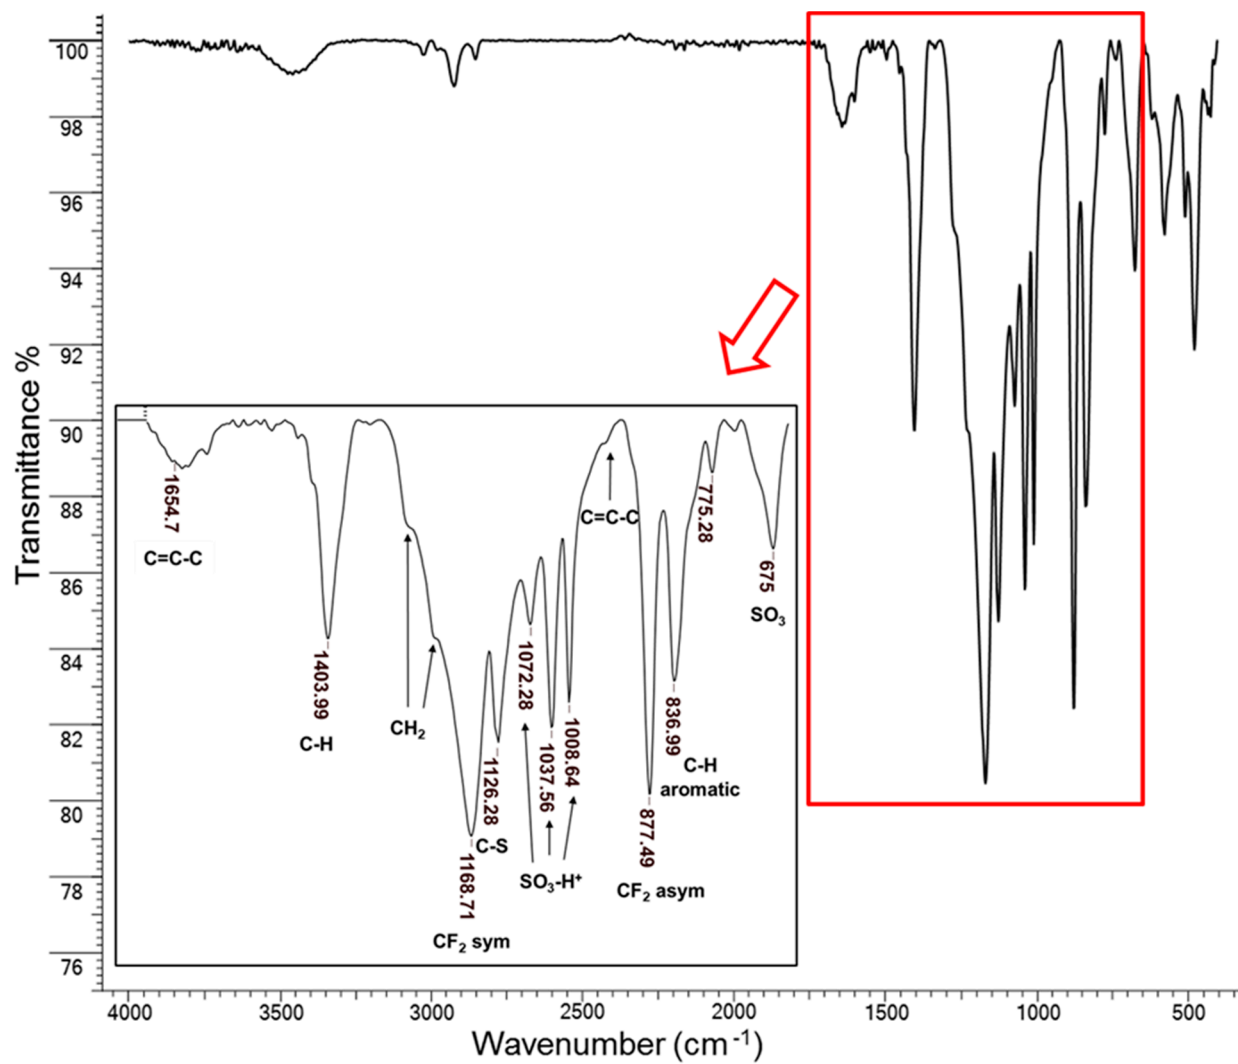

**Figure S2.** IR spectrum of the CJMC-3 membrane.

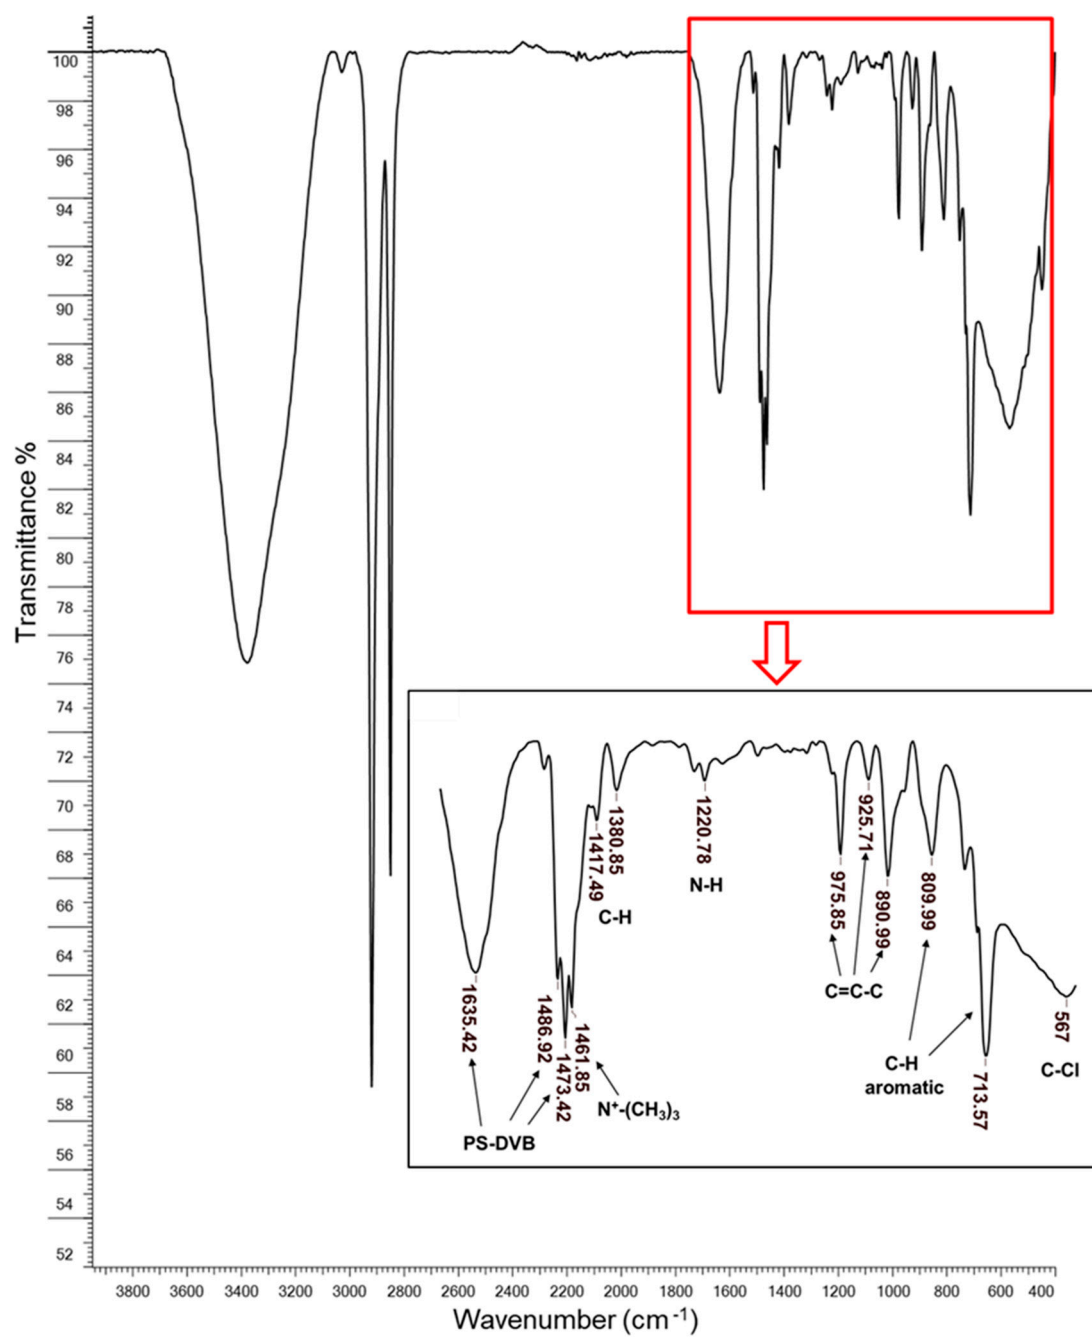

**Figure S3.** IR spectrum of the ASE membrane.

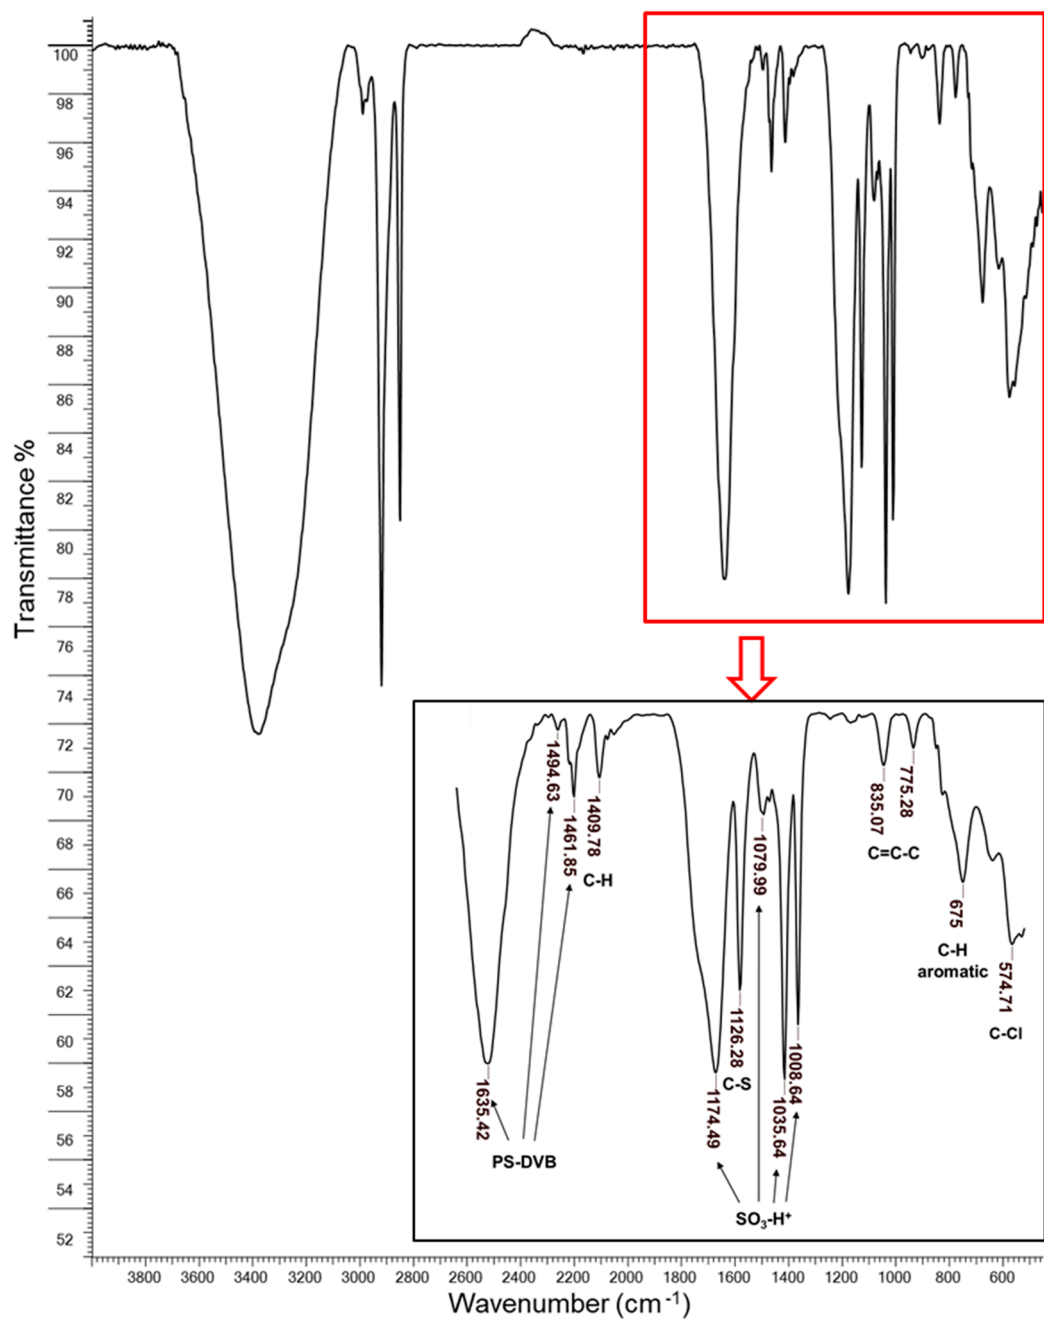

Figure S4. IR spectrum of the CSE membrane

## S2. Structures of anthocyanins and their color

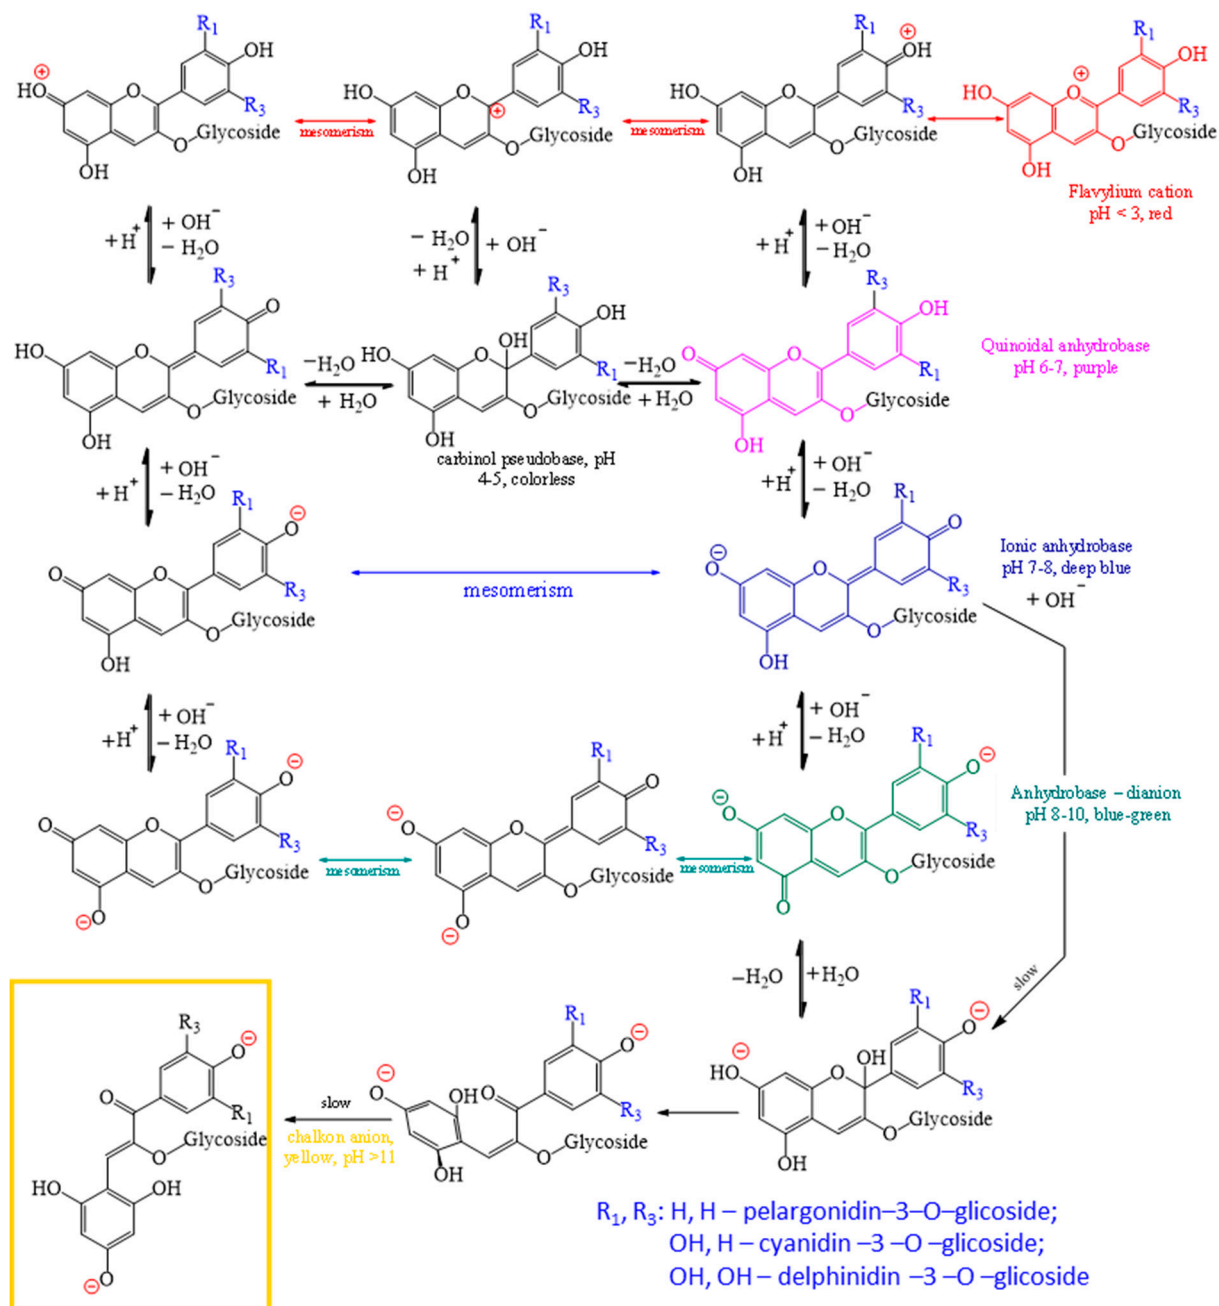

**Figure S5.** The structures of anthocyanins and their modifications depending on the pH of the medium. Adapted from [Ribéreau-Gayon et al., 2006].  $R_1, R_3$  are –H, or –OH, or –OCH<sub>3</sub> groups; *Glycoside* is glucose, rhamnose, arabinose or galactose.

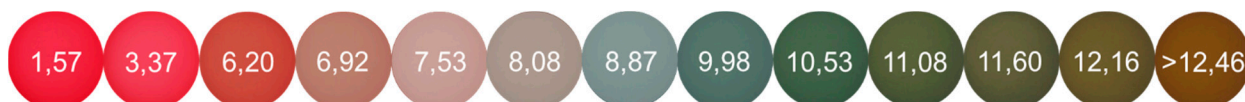

**Figure S6.** Effect of pH on the color of model solution. The pH values of the solutions are indicated for each color.
